# Supplementary material
Source: Springer Nature journal article supplement (https://www.springermedizin.de/resource/supplementary/40478_2013_15_MOESM1_ESM.pdf/25657964)
Supplement: MOESM1 [file 25657964]

## Supplementary data 1

(a)

|               | ICAM1 mRNA transcript |               | CRK mRNA transcript |              | CD36 mRNA transcript |               | IQGAP1 mRNA transcript |               |
|---------------|-----------------------|---------------|---------------------|--------------|----------------------|---------------|------------------------|---------------|
|               | Cerebellar PA         | H/C PA        | Cerebellar PA       | H/C PA       | Cerebellar PA        | H/C PA        | Cerebellar PA          | H/C PA        |
| <i>n</i>      | 27                    | 17            | 27                  | 17           | 27                   | 17            | 27                     | 17            |
| <b>Median</b> | <b>1000.3</b>         | <b>2126.6</b> | <b>143.7</b>        | <b>232.3</b> | <b>1071.0</b>        | <b>1837.5</b> | <b>732.6</b>           | <b>1468.1</b> |
| Q1            | 639.7                 | 1212.3        | 112.8               | 163.9        | 436.6                | 857.7         | 321.3                  | 710.7         |
| Q3            | 2056.0                | 4823.3        | 241.9               | 418.6        | 2055.2               | 4452.3        | 1105.7                 | 3436.7        |

(b)

|               | ICAM1 mRNA transcript |               | CRK mRNA transcript |              |
|---------------|-----------------------|---------------|---------------------|--------------|
|               | GBM                   | PA            | GBM                 | PA           |
| <i>n</i>      | 10                    | 51            | 10                  | 51           |
| <b>Median</b> | <b>475.8</b>          | <b>1427.5</b> | <b>91.2</b>         | <b>179.6</b> |
| Q1            | 336.1                 | 707.5         | 71.4                | 130.3        |
| Q3            | 906.7                 | 2790.2        | 97.9                | 334.3        |

(c)

|                    | ICAM1 mRNA transcript | CRK mRNA transcript | CD36 mRNA transcript | IQGAP1 mRNA transcript |
|--------------------|-----------------------|---------------------|----------------------|------------------------|
| <b>U87-MG</b>      | 200.9                 | 159.8               | 162.2                | 5110.7                 |
| <b>U118</b>        | 1355.8                | 62.9                | 49.8                 | 526.1                  |
| <b>PA-NAV</b>      | 5016.8                | 243.3               | 1356.6               | 732.7                  |
| <b>PA-GAS</b>      | 621.94                | 162.59              | 5204.36              | 235.92                 |
| <b>PA-PET</b>      | 2580.31               | 116.06              | 1032.4               | 204.17                 |
| <b>Case report</b> | 2889.4                | 232.4               | 4624.2               | 1023.5                 |
